# Supplementary material for: Combination Therapy for Neuropathic Pain. A Systematic Review
Source: Preprints.org preprint supplement (doi:10.20944/preprints202106.0200.v1), 2021-06-08
Supplement: Supplementary file 1 [file supplementary]

Archive with 12 entries (11 files):
-  supplementary material/
- __MACOSX/._ supplementary material
-  supplementary material/.DS_Store
- __MACOSX/ supplementary material/._.DS_Store
-  supplementary material/SUPPLEMENTAL MATERIAL - table s1.docx
- __MACOSX/ supplementary material/._SUPPLEMENTAL MATERIAL - table s1.docx
-  supplementary material/PRISMA 2009 checklist.pdf
- __MACOSX/ supplementary material/._PRISMA 2009 checklist.pdf
-  supplementary material/Figure S2.jpg
- __MACOSX/ supplementary material/._Figure S2.jpg
-  supplementary material/Figure S1.jpg
- __MACOSX/ supplementary material/._Figure S1.jpg
