# Supplementary material for: Combination Therapy for Neuropathic Pain. A Systematic Review
Source: Preprints.org preprint supplement (doi:10.20944/preprints202106.0200.v1), 2021-06-08
Supplement: Supplementary file 1 [file supplementary › supplementary material/SUPPLEMENTAL MATERIAL - table s1.docx]

SUPPLEMENTAL MATERIAL: Table S1. Secondary outcomes and other evaluations

|  | NP symptoms | PGIC | BPI | Rescue medication prescribed / analyzed | concomitant medication | sleep interference | Sensory test | Other | Safety (SAEs) reported (whether it happened or not) | Type of AEs | Drop-out by AEs |
| --- | --- | --- | --- | --- | --- | --- | --- | --- | --- | --- | --- |
| Langford, 2013 43 | ? | yes (¬) | yes | yes / no | yes | yes (**) | no | no | yes | yes | yes |
| Irving, 2012 44 | no | yes | no | yes / no | yes | no | no | no | yes | yes | yes |
| Shaibani, 2012 45 | no | no | no | yes / yes | ? | yes | no | no | yes | yes | yes |
| Tesfaye, 2013 42 | ? | yes | yes | no / no | no | yes | no | no | yes | yes | yes |
| Holbech, 2015 38 | yes | no | no | yes / yes | no | no | yes | QST post-hoc | yes | yes | yes |
| Matsuoka, 2019 32 | no | no | yes | yes / yes | yes | ? (##) | no | no | yes | yes | ? |
| Singh, 2021 30 | ? | no | no | no / no | no | no | # | VDT | no | yes | no |
| Rigo, 2017 34 | yes | no | no | yes / ? | yes | yes | no | no | no | yes | yes |
| Kim, 2016 35 | no | no | no | no / no | no | no | no | no | no | yes | no |
| Baron, 2014 36 | yes | yes | no | ? / no | ? | yes | no | no | yes | yes | yes |
| Gilron, 2015 37 | yes | no | yes | no / no | yes | yes | no | no | no | yes | yes |
| Pickering, 2020 31 | yes | yes | yes | no / no | yes | yes | no | no | yes | yes | * |
| Turcotte, 2015 39 | no | yes | no | no / no | ? | no | no | no | yes | ? | yes |
| Harrison, 2013 41 | no | no | no | yes / ? | ? | no | no | no | yes | yes | yes |
| Dou, 2017 33 | no | no | no | yes / ? | no | yes | no | Decrements in morphine | no | yes | yes |
| Garassino, 2013 40 | no | no | no | no / no | no | no | no | polymorphism n.s | no | ? | yes |

This table evaluates other characteristics reported in studies. NP = neuropathic pain, PGIC = patient global impression of change, BPI = brief pain inventory, SAEs = serious adverse events, AEs = adverse events, ¬ = SGIC (subjective global impression of change), ** = measured only by quality, ## = measured by QoL - Quality of Life, * = reported to have zero drop-outs, QST = quantitative sensory testing, VDT = vibration detection threshold, ? = data unclear, n.s = not significant.
