# Supplementary figures and images for: Combination Therapy for Neuropathic Pain. A Systematic Review
Source: Preprints.org preprint supplement (doi:10.20944/preprints202106.0200.v1), 2021-06-08

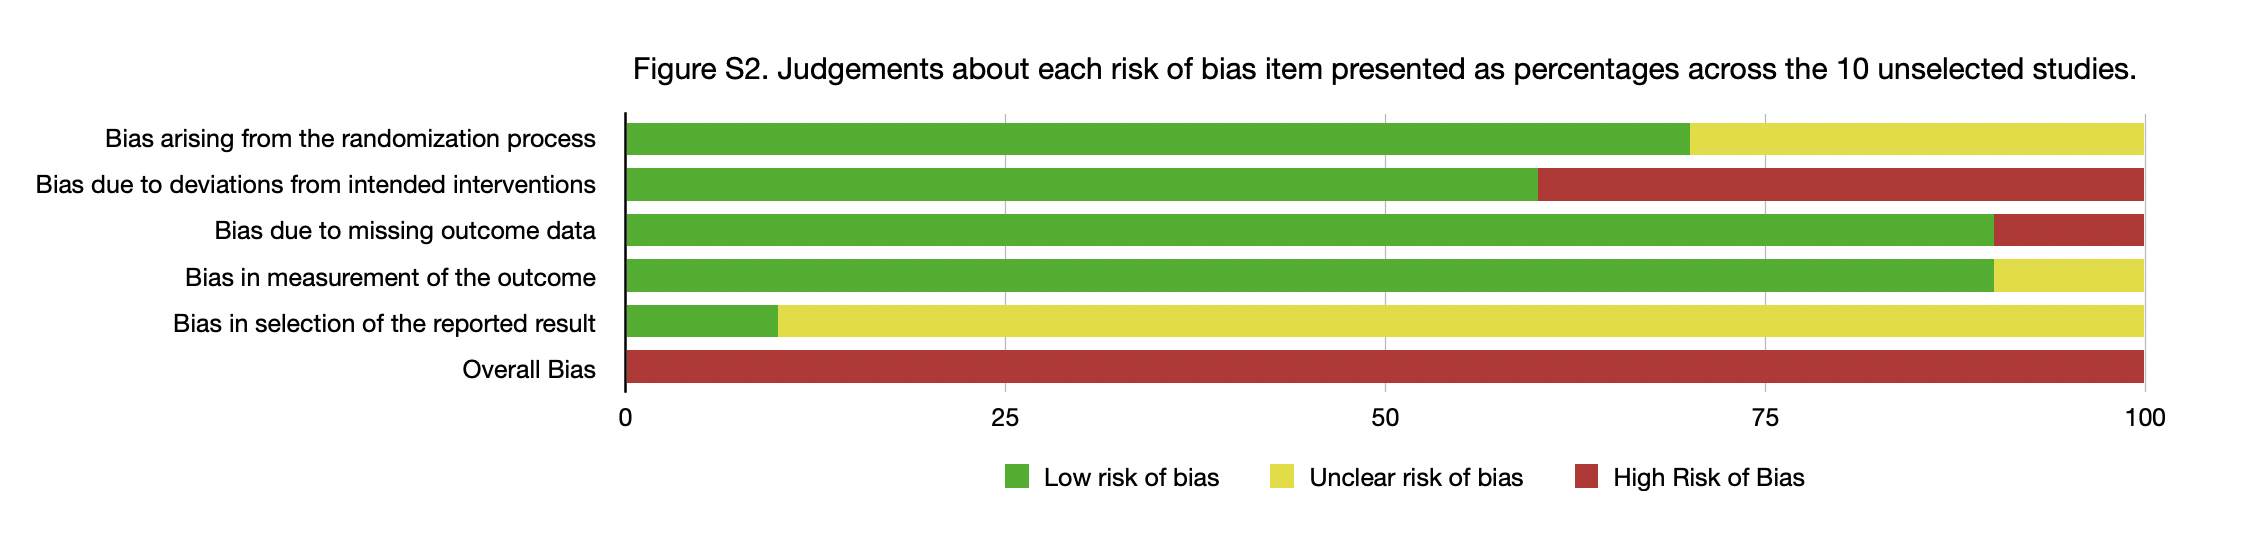

Supplement: Supplementary file 1 [file supplementary › supplementary material/Figure S2.jpg]

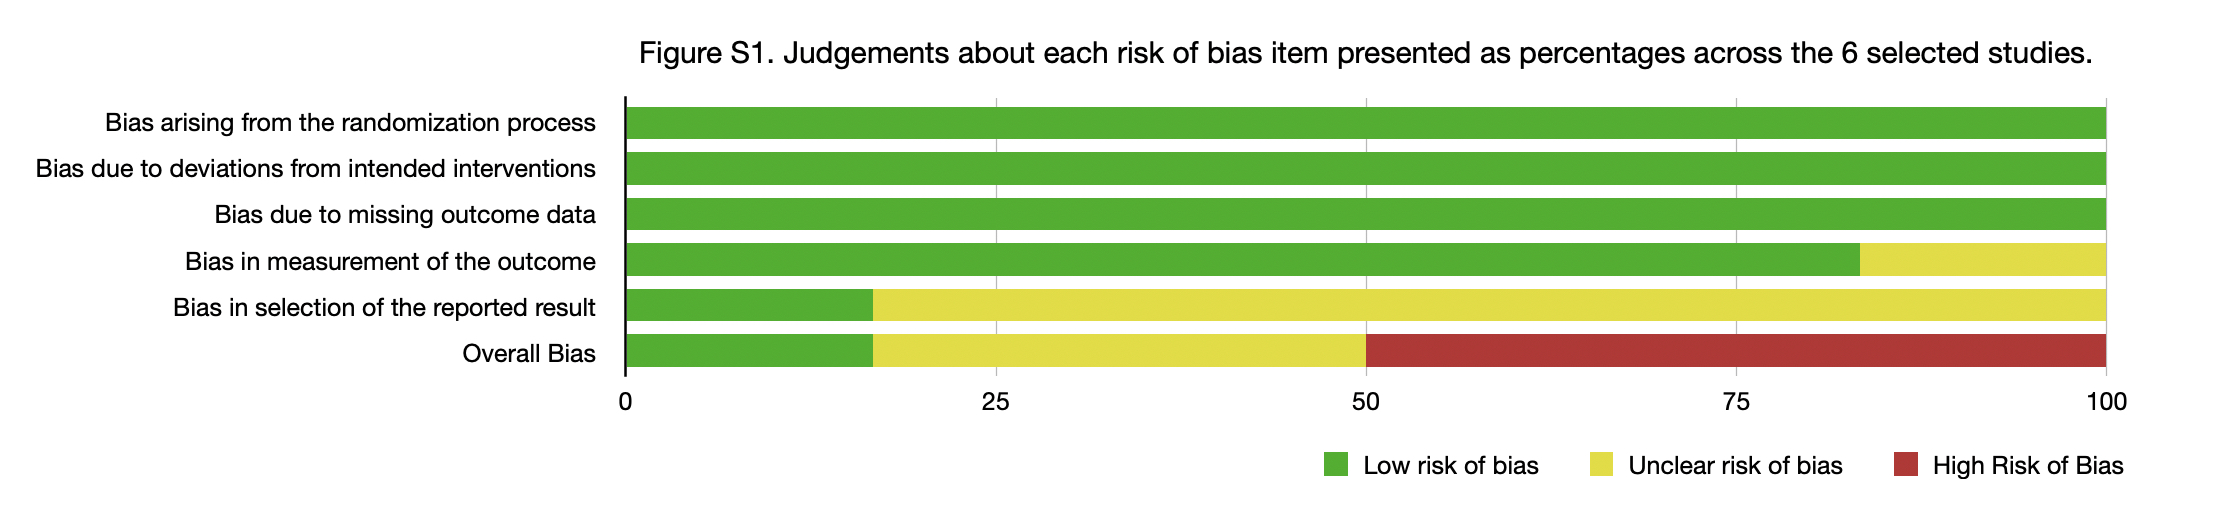

Supplement: Supplementary file 1 [file supplementary › supplementary material/Figure S1.jpg]
